# Supplementary material for: Deep Learning-Based Electrocardiogram Signal Noise Detection and Screening Model
Source: PubMed Central journal article supplement — Healthc Inform Res. 2019 Jul 31;25(3):201–11. doi: 10.4258/hir.2019.25.3.201 (PMC6689506; doi:10.4258/hir.2019.25.3.201), 2019-07-31
Supplement: hir-25-201-s001.pdf [file hir-25-201-s001.pdf]

Table S1. Performance of the model in cross-validation

| Model structure | Kernel size | Sequence of cross-validation |          |          |          |          |          |          |          |          | Average  | SD    |       |
|-----------------|-------------|------------------------------|----------|----------|----------|----------|----------|----------|----------|----------|----------|-------|-------|
|                 |             | 1                            | 2        | 3        | 4        | 5        | 6        | 7        | 8        | 9        |          |       |       |
| Accuracy        | 1           | 16                           | 0.94     | 0.92     | 0.955    | 0.95     | 0.945    | 0.925    | 0.92     | 0.945    | 0.925    | 0.936 | 0.014 |
|                 |             | 48                           | 0.93     | 0.95     | 0.95     | 0.945    | 0.93     | 0.925    | 0.915    | 0.925    | 0.925    | 0.933 | 0.013 |
|                 |             | 96                           | 0.93     | 0.93     | 0.95     | 0.95     | 0.925    | 0.925    | 0.925    | 0.925    | 0.92     | 0.94  | 0.933 |
|                 | 2           | 16                           | 0.95     | 0.95     | 0.965    | 0.96     | 0.975    | 0.94     | 0.93     | 0.95     | 0.955    | 0.953 | 0.013 |
|                 |             | 48                           | 0.96     | 0.965    | 0.96     | 0.96     | 0.96     | 0.915    | 0.92     | 0.945    | 0.965    | 0.95  | 0.019 |
|                 |             | 96                           | 0.94     | 0.955    | 0.945    | 0.945    | 0.955    | 0.95     | 0.915    | 0.945    | 0.925    | 0.942 | 0.013 |
|                 | 3           | 16                           | 0.945    | 0.935    | 0.965    | 0.96     | 0.975    | 0.95     | 0.93     | 0.965    | 0.925    | 0.95  | 0.018 |
|                 |             | 48                           | 0.945    | 0.945    | 0.965    | 0.965    | 0.965    | 0.92     | 0.94     | 0.95     | 0.945    | 0.949 | 0.015 |
|                 |             | 96                           | 0.945    | 0.96     | 0.955    | 0.935    | 0.965    | 0.945    | 0.92     | 0.955    | 0.95     | 0.948 | 0.014 |
|                 | 4           | 16                           | 0.965    | 0.945    | 0.965    | 0.94     | 0.965    | 0.935    | 0.905    | 0.97     | 0.95     | 0.949 | 0.021 |
|                 |             | 48                           | 0.94     | 0.915    | 0.93     | 0.955    | 0.975    | 0.92     | 0.925    | 0.94     | 0.955    | 0.939 | 0.019 |
|                 |             | 96                           | 0.905    | 0.92     | 0.945    | 0.935    | 0.925    | 0.875    | 0.915    | 0.9      | 0.93     | 0.917 | 0.021 |
| Loss            | 1           | 16                           | 0.196803 | 0.180902 | 0.159732 | 0.148515 | 0.159845 | 0.197747 | 0.185245 | 0.186281 | 0.173647 | 0.177 | 0.017 |
|                 |             | 48                           | 0.182121 | 0.145595 | 0.174674 | 0.153238 | 0.153742 | 0.201565 | 0.185535 | 0.153335 | 0.181402 | 0.17  | 0.019 |
|                 |             | 96                           | 0.176046 | 0.164441 | 0.163633 | 0.130275 | 0.148518 | 0.201687 | 0.177159 | 0.171503 | 0.157964 | 0.166 | 0.02  |
|                 | 2           | 16                           | 0.144607 | 0.131058 | 0.128361 | 0.113187 | 0.095492 | 0.128954 | 0.178408 | 0.146933 | 0.114242 | 0.131 | 0.024 |
|                 |             | 48                           | 0.146494 | 0.145255 | 0.130595 | 0.132619 | 0.092045 | 0.198015 | 0.222153 | 0.151735 | 0.109284 | 0.148 | 0.041 |
|                 |             | 96                           | 0.178614 | 0.132012 | 0.135564 | 0.124807 | 0.089204 | 0.165393 | 0.199652 | 0.135041 | 0.12677  | 0.143 | 0.033 |
|                 | 3           | 16                           | 0.124032 | 0.144932 | 0.095528 | 0.118884 | 0.08164  | 0.122793 | 0.175086 | 0.096086 | 0.135459 | 0.122 | 0.029 |
|                 |             | 48                           | 0.131825 | 0.126125 | 0.129057 | 0.121123 | 0.100948 | 0.151589 | 0.228215 | 0.119582 | 0.124539 | 0.137 | 0.037 |
|                 |             | 96                           | 0.181194 | 0.113877 | 0.146329 | 0.161846 | 0.086216 | 0.168897 | 0.222971 | 0.126933 | 0.108136 | 0.146 | 0.042 |
|                 | 4           | 16                           | 0.121676 | 0.127271 | 0.106599 | 0.134978 | 0.074822 | 0.142929 | 0.196258 | 0.078155 | 0.142056 | 0.125 | 0.037 |
|                 |             | 48                           | 0.124585 | 0.157018 | 0.151598 | 0.107424 | 0.084093 | 0.162721 | 0.240863 | 0.130281 | 0.128342 | 0.143 | 0.044 |
|                 |             | 96                           | 0.275127 | 0.181807 | 0.242944 | 0.149344 | 0.143794 | 0.240687 | 0.348135 | 0.273538 | 0.153848 | 0.223 | 0.071 |
